# Supplementary material for: Conducting a prospective evaluation of the development of a complex psycho-oncological care programme (isPO) in Germany
Source: Springer Nature journal article supplement (doi:10.1186/s12913-022-07951-1), 2022-04-21
Supplement: MOESM1 [file 20330388]

## Additional file 1

Table A.1. List of consortium partners conducting the isPO project.

| Abbreviation | isPO consortium partner                                                                                                                                       |
|--------------|---------------------------------------------------------------------------------------------------------------------------------------------------------------|
| MED I        | Department of Internal Medicine, Section: Clinical Psycho-Oncology, Working Group Psycho-Oncological Health Services Research, University Hospital of Cologne |
| KPP          | Clinical Psychology and Psychotherapy, University of Cologne                                                                                                  |
| IMSB         | Institute of Medical Statistics and Computational Biology, University of Cologne                                                                              |
| IGKE         | Institute of Health Economics and Clinical Epidemiology, University of Cologne                                                                                |
| MIFH         | Department of Computer Science (Medical Informatics), University of Applied Sciences and Arts Dortmund                                                        |
| IMVR         | Institute of Medical Sociology, Health Services Research and Rehabilitation Science, University of Cologne                                                    |
| KGNRW        | Cancer Society North Rhine-Westphalia                                                                                                                         |
| HKSH         | House of Cancer Patient Support Associations of Germany                                                                                                       |
| TK           | Techniker Krankenkasse (statutory health insurance fund)                                                                                                      |
| BARMER       | BARMER (statutory health insurance fund)                                                                                                                      |
| AOK          | AOK Rheinland/Hamburg (statutory health insurance fund)                                                                                                       |
