# Supplementary material for: Conducting a prospective evaluation of the development of a complex psycho-oncological care programme (isPO) in Germany
Source: Springer Nature journal article supplement (doi:10.1186/s12913-022-07951-1), 2022-04-21
Supplement: MOESM2 [file 20330388]

## Additional file 2

Table A.2. Coding system for the analyses of the focus group and telephone interview.

| Core categories                                   | Subcategories                                                  |
|---------------------------------------------------|----------------------------------------------------------------|
| Expectations of the isPO programme                |                                                                |
| Cooperation of project partners                   | Communication                                                  |
|                                                   | Distribution of tasks                                          |
|                                                   | Overarching cooperation of the project partners                |
|                                                   | Workload                                                       |
|                                                   | Intensity                                                      |
|                                                   | Engagement of the project partners                             |
|                                                   | Dependencies                                                   |
| Cooperation with care networks                    | Communication                                                  |
|                                                   | Intensity                                                      |
|                                                   | Contents of the cooperation                                    |
| Facilitators of implementation into care networks | Acceptance and motivation of the service providers             |
|                                                   | Structure and quality assurance of the isPO programme          |
|                                                   | Monetary incentive                                             |
|                                                   | Patient orientation                                            |
|                                                   | Care networks' structure                                       |
|                                                   | Preservation of therapeutic freedom                            |
| Barriers of implementation into care networks     | Care networks' negative attitude                               |
|                                                   | Increased expenditure                                          |
|                                                   | Determination of included professions                          |
|                                                   | Structure of the care networks                                 |
|                                                   | Study part of the isPO project                                 |
|                                                   | Financial interests of the care networks                       |
|                                                   | Low patient orientation                                        |
|                                                   | Ambiguities and uncertainties in the care networks             |
| Implementation strategies                         | Dealing with resistance / non-execution of the isPO guidelines |
|                                                   | Contact person                                                 |
|                                                   | Communication paths                                            |
|                                                   | Trainings                                                      |
|                                                   | CAPSYS                                                         |
|                                                   | Preparation of the concept contents                            |
|                                                   | Handouts                                                       |

| Core categories                                        | Subcategories                    |
|--------------------------------------------------------|----------------------------------|
| Facilitators for implementation into conventional care | Patient interest                 |
|                                                        | Useful evaluation                |
|                                                        | Political commitment             |
|                                                        | Uniform care structure           |
| Barriers for implementation into conventional care     | Professional policy factors      |
|                                                        | Bureaucratic hurdles             |
|                                                        | Methodological weaknesses        |
|                                                        | Unclear implementation framework |
