# Supplementary material for: Conducting a prospective evaluation of the development of a complex psycho-oncological care programme (isPO) in Germany
Source: Springer Nature journal article supplement (doi:10.1186/s12913-022-07951-1), 2022-04-21
Supplement: MOESM4 [file 20330388]

## Additional file 4

Table A.4. Descriptive statistics for each item of the basic training evaluation 'introduction to isPO and care levels 0 and 1'.

| Item                                                      | Valid cases | Missings | M    | SD   | Min | Max |
|-----------------------------------------------------------|-------------|----------|------|------|-----|-----|
| The training provided a comprehensible introduction to... |             |          |      |      |     |     |
| ... the fundamental structure of the project.             | 21          | 0        | 3.57 | 0.51 | 3   | 4   |
| ...the concept of the isPO care form.                     | 21          | 0        | 3.24 | 0.77 | 2   | 4   |
| ...the structure and function of the care networks.       | 21          | 0        | 3.05 | 0.74 | 2   | 4   |
| ...the care procedures in the care levels.                | 21          | 0        | 3.10 | 0.70 | 2   | 4   |
| ...the quality management system.                         | 20          | 1        | 3.05 | 0.60 | 2   | 4   |
| ...the procedures for patient information and enrolment.  | 20          | 1        | 3.10 | 0.72 | 2   | 4   |
| ... the onco-guide concept.                               | 20          | 1        | 3.35 | 0.59 | 2   | 4   |
| ...my task area in the onco-guide's care.                 | 17          | 4        | 2.88 | 0.86 | 1   | 4   |
| All my questions were answered during the training.       | 18          | 3        | 2.78 | 0.73 | 2   | 4   |
| The time frame of the training was appropriate.           | 20          | 1        | 2.70 | 0.80 | 1   | 4   |
| The trainers were competent.                              | 21          | 0        | 3.76 | 0.44 | 3   | 4   |
| The trainers were motivated.                              | 19          | 2        | 3.74 | 0.45 | 3   | 4   |
| The training was well organised.                          | 21          | 0        | 3.43 | 0.60 | 2   | 4   |
| Overall, I am satisfied with the training.                | 21          | 0        | 3.24 | 0.70 | 2   | 4   |
