# Supplementary material for: Conducting a prospective evaluation of the development of a complex psycho-oncological care programme (isPO) in Germany
Source: Springer Nature journal article supplement (doi:10.1186/s12913-022-07951-1), 2022-04-21
Supplement: MOESM5 [file 20330388]

## Additional file 5

Table A.5. Descriptive statistics for each item of the basic training evaluation 'care levels 2 and 3'.

| Item                                                                 | Valid cases | Missings | M    | SD   | Min | Max |
|----------------------------------------------------------------------|-------------|----------|------|------|-----|-----|
| The training provided a comprehensible introduction to...            |             |          |      |      |     |     |
| ...the concept of the psychosocial care.                             | 7           | 0        | 3.43 | 0.53 | 3   | 4   |
| ...the procedures of the psychosocial care.                          | 7           | 0        | 3.29 | 0.49 | 3   | 4   |
| ...the evaluation of psychosocial support needs.                     | 7           | 0        | 3.43 | 0.53 | 3   | 4   |
| ...the concept of the psycho-oncological-psychotherapeutic care.     | 7           | 0        | 3.43 | 0.79 | 2   | 4   |
| ...the procedures of the psycho-oncological-psychotherapeutic care.  | 6           | 1        | 3.67 | 0.52 | 3   | 4   |
| ...the structure of the intervention modules of the isPO manual.     | 6           | 1        | 3.17 | 0.41 | 3   | 4   |
| ...the concept of the complex psycho-oncological care (level 3b).    | 6           | 1        | 3.33 | 0.82 | 2   | 4   |
| ...the procedures of the complex psycho-oncological care (level 3b). | 6           | 1        | 3.50 | 0.55 | 3   | 4   |
| All my questions were answered during the training.                  | 6           | 1        | 3.50 | 0.55 | 3   | 4   |
| The time frame of the training was appropriate.                      | 7           | 0        | 3.71 | 0.49 | 3   | 4   |
| The trainers were competent.                                         | 7           | 0        | 3.86 | 0.38 | 3   | 4   |
| The trainers were motivated.                                         | 7           | 0        | 4.00 | 0.00 | 4   | 4   |
| The training was well organised.                                     | 7           | 0        | 3.86 | 0.38 | 3   | 4   |
| Overall, I am satisfied with the training.                           | 7           | 0        | 3.86 | 0.38 | 3   | 4   |
