# Supplementary material for: Conducting a prospective evaluation of the development of a complex psycho-oncological care programme (isPO) in Germany
Source: Springer Nature journal article supplement (doi:10.1186/s12913-022-07951-1), 2022-04-21
Supplement: MOESM6 [file 20330388]

## Additional file 6

Table A.6. Descriptive statistics for each item of the isPO onco-guide training evaluation.

| Item                                                                     | Session 1   |          |      |      |     |     | Session 2   |          |      |      |     |     |
|--------------------------------------------------------------------------|-------------|----------|------|------|-----|-----|-------------|----------|------|------|-----|-----|
|                                                                          | Valid cases | Missings | M    | SD   | Min | Max | Valid cases | Missings | M    | SD   | Min | Max |
| There has been sufficient training on...                                 |             |          |      |      |     |     |             |          |      |      |     |     |
| ...the isPO care programme.                                              | 8           | 1        | 4.00 | 0.00 | 4   | 4   | 10          | 0        | 3.60 | 0.52 | 3   | 4   |
| ...the onco-guide concept.                                               | 9           | 0        | 3.78 | 0.44 | 3   | 4   | 10          | 0        | 3.60 | 0.52 | 3   | 4   |
| ...the contents and use of the onco-guide information package.           | 9           | 0        | 3.56 | 0.53 | 3   | 4   | 10          | 0        | 3.60 | 0.52 | 3   | 4   |
| ...the task area of the onco-guide                                       | 9           | 0        | 3.78 | 0.44 | 3   | 4   | 10          | 0        | 3.70 | 0.48 | 3   | 4   |
| ...the conversational technique of an onco-guide.                        | 8           | 1        | 3.38 | 0.52 | 3   | 4   | 10          | 0        | 3.80 | 0.42 | 3   | 4   |
| ...the documentation of the onco-guide meeting.                          | 9           | 0        | 3.56 | 0.53 | 3   | 4   | 9           | 1        | 3.89 | 0.33 | 3   | 4   |
| ... data protection and confidentiality.                                 | 9           | 0        | 3.78 | 0.44 | 3   | 4   | 10          | 0        | 3.90 | 0.32 | 3   | 4   |
| ...the transition from certification to deployment in the care networks. | 8           | 1        | 3.63 | 0.52 | 3   | 4   | 10          | 0        | 3.40 | 0.70 | 2   | 4   |
| All my questions were answered during the training.                      | 9           | 0        | 3.56 | 0.73 | 2   | 4   | 9           | 1        | 3.33 | 0.50 | 3   | 4   |
| The time frame of the training was appropriate.                          | 9           | 0        | 3.56 | 0.53 | 3   | 4   | 10          | 0        | 3.70 | 0.48 | 3   | 4   |
| The trainers were competent.                                             | 9           | 0        | 3.78 | 0.44 | 3   | 4   | 10          | 0        | 3.90 | 0.32 | 3   | 4   |
| The trainers were motivated.                                             | 9           | 0        | 3.78 | 0.44 | 3   | 4   | 10          | 0        | 3.90 | 0.32 | 3   | 4   |
| The training was well organised.                                         | 9           | 0        | 3.89 | 0.33 | 3   | 4   | 10          | 0        | 3.90 | 0.32 | 3   | 4   |
| Overall, I am satisfied with the training.                               | 9           | 0        | 3.78 | 0.44 | 3   | 4   | 10          | 0        | 3.80 | 0.42 | 3   | 4   |
