# Supplementary material for: Conducting a prospective evaluation of the development of a complex psycho-oncological care programme (isPO) in Germany
Source: Springer Nature journal article supplement (doi:10.1186/s12913-022-07951-1), 2022-04-21
Supplement: MOESM7 [file 20330388]

## Additional file 7

Table A.7. Descriptive statistics for each item of the CAPSYS<sup>2020</sup> training evaluation.

| Item                                                                            | Valid cases | Missings | M    | SD   | Min | Max |
|---------------------------------------------------------------------------------|-------------|----------|------|------|-----|-----|
| The general usage of CAPSYS was explained comprehensibly.                       | 5           | 0        | 4.00 | 0.00 | 4   | 4   |
| The use of the functions that are relevant for me was explained comprehensibly. | 5           | 0        | 4.00 | 0.00 | 4   | 4   |
| The care management by CAPSYS was explained comprehensibly.                     | 5           | 0        | 4.00 | 0.00 | 4   | 4   |
| All my questions were answered during the training.                             | 5           | 0        | 3.40 | 0.55 | 3   | 4   |
| The time frame of the training was appropriate.                                 | 5           | 0        | 3.60 | 0.55 | 3   | 4   |
| The trainers were competent.                                                    | 5           | 0        | 4.00 | 0.00 | 4   | 4   |
| The trainers were motivated.                                                    | 5           | 0        | 4.00 | 0.00 | 4   | 4   |
| The training was well organised.                                                | 5           | 0        | 4.00 | 0.00 | 4   | 4   |
| Overall, I am satisfied with the training.                                      | 5           | 0        | 3.80 | 0.45 | 3   | 4   |
